# Supplementary material
Source: Springer Nature journal article supplement (https://www.springermedizin.de/resource/supplementary/12889_2010_2687_MOESM2_ESM.pdf/9487068)
Supplement: MOESM2 [file 9487068]

**“Young peoples views on...” Categories**

**Themes**

Becoming a smoker

- \* Handling vulnerability
- \* A social game
- \* Perceiving positive functions

**Gaining control**

Facilitating smoking

- \* Normalization
- \* Inconsequential
- \* Dissociation and distance
- \* Risk denial

**Becoming a part of the self**

Preventing smoking

- \* Adult duty to care
- \* Trustworthy adults
- \* Closeness means almost everything

**Concerned adults make a difference**
